# Supplementary material
Source: publisher figshare collection journal article supplement (https://plos.figshare.com/articles/dataset/_/4619158)
Supplement: Supplementary file [file 1]

## Supporting information

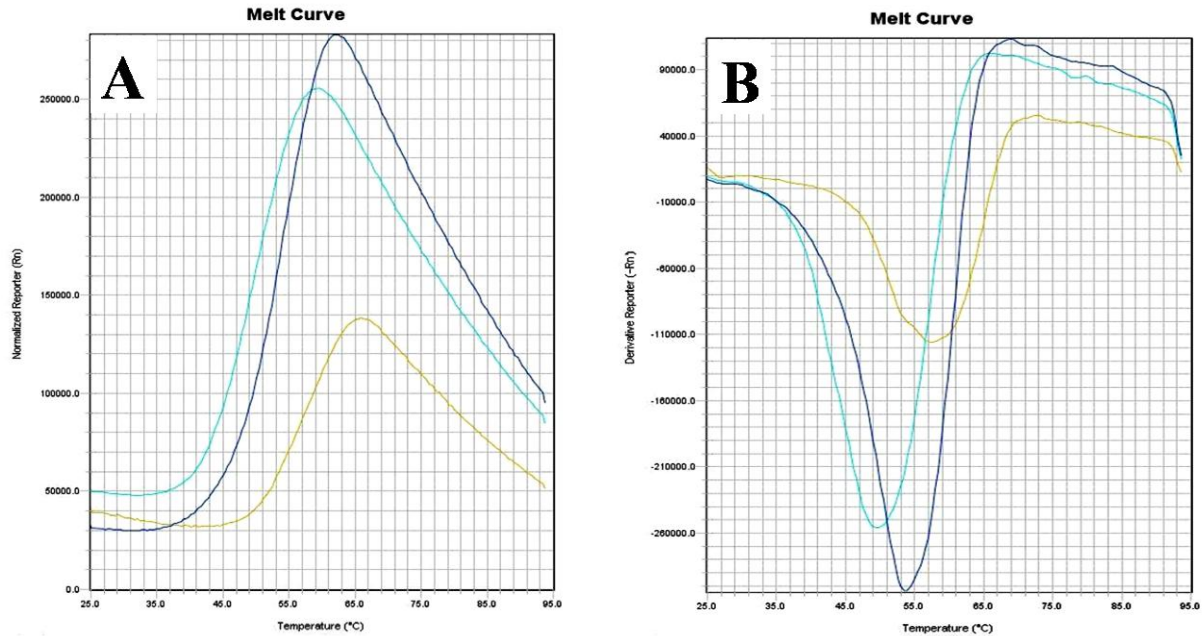

**S3 Fig. Thermal stability of PaDHPAO.** Fluorescence changes of a SYPRO Orange dye (Invitrogen, USA) in the presence of three PaDHPAO samples including apoPaDHPAO, activated PaDHPAO, and activated PaDHPAO plus ascorbic acid were monitored using a real-time PCR machine with temperature increase from 25-95 °C with a constant increment of 1 °C/min. The normalized (A) and derivative (B) curves of thermal stability showed that the melting temperature ( $T_m$ ) of three PaDHPAO samples, apoPaDHPAO (yellow), activated PaDHPAO (cyan), and activated PaDHPAO plus ascorbic acid (dark blue), are in a similar temperature range of 50-55 °C.
